# Supplementary material for: Fabrication of Temperature Sensors with High-Performance Uniformity through Thermal Annealing
Source: MDPI journal article supplement (doi:10.3390/ma16041491), 2023-02-10
Supplement: s1 [file s1]

## Supporting information

# Fabrication of Temperature Sensors with High-Performance Uniformity through Thermal Annealing

Hongrui Liu <sup>1,†</sup>, Yongchun Li <sup>2,†</sup>, Weiji Xie <sup>2</sup>, Xinyi Zhou <sup>1</sup>, Jishuang Hong <sup>2</sup>, Junfeng Liang <sup>1</sup>, Yanghui Liu <sup>1,\*</sup>, Wei Li <sup>2,\*</sup> and Hong Wang <sup>1,\*</sup>

<sup>1</sup> School of Materials, Shenzhen Campus of Sun Yat-sen University, Shenzhen 518107, China

<sup>2</sup> Department of Anesthesiology, Sun Yat-sen University Cancer Center, State Key Laboratory of Oncology in South China, Guangzhou 510060, China

\* Correspondence: liuyanghui@mail.sysu.edu.cn (Y.L.); liw@sysucc.org.cn (W.L.); wanghong3@mail.sysu.edu.cn (H.W.)

† These authors contributed equally to this work.

## 1. The I-V curves of the Gr-AC temperature sensor at room temperature

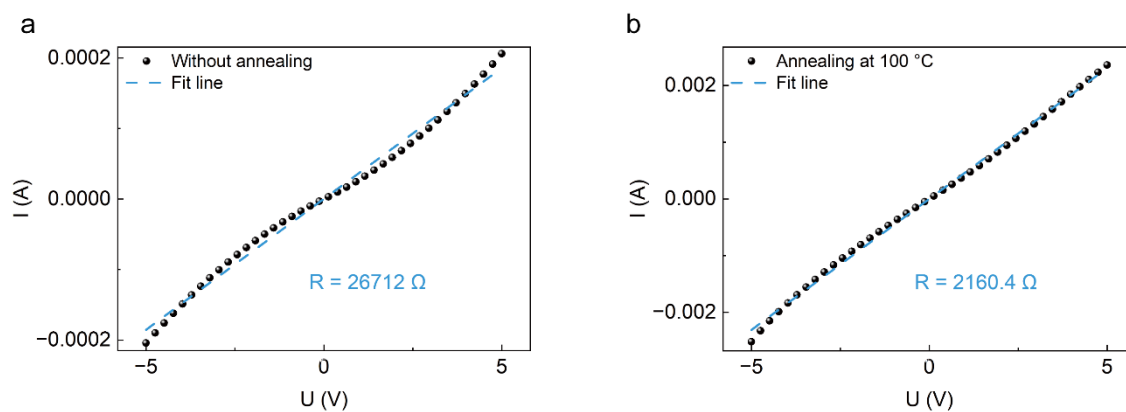

**Figure S1.** The I-V curves of the Gr-AC temperature sensor at room temperature. After annealing, the DC resistance is significantly reduced.

## 2. The annealing time

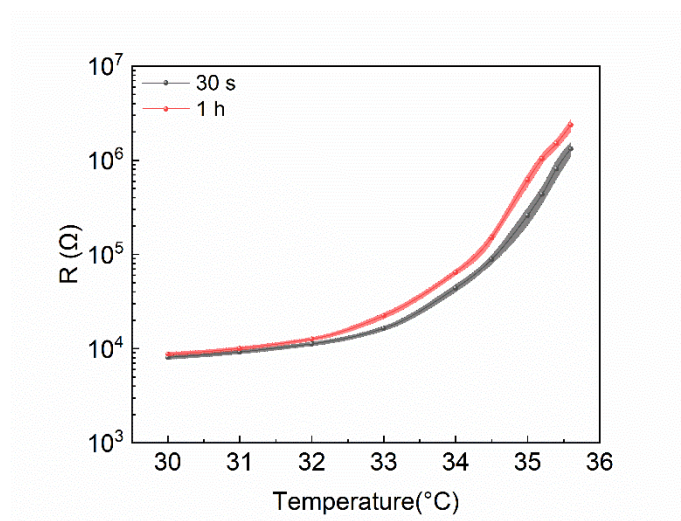

**Figure S2.** Performance comparison of 10 temperature sensors annealed at 100  $^{\circ}\text{C}$  for 30 s and 1 h. The error bar represents the standard error.

### 3. Calculation of grayscale values for SEM images

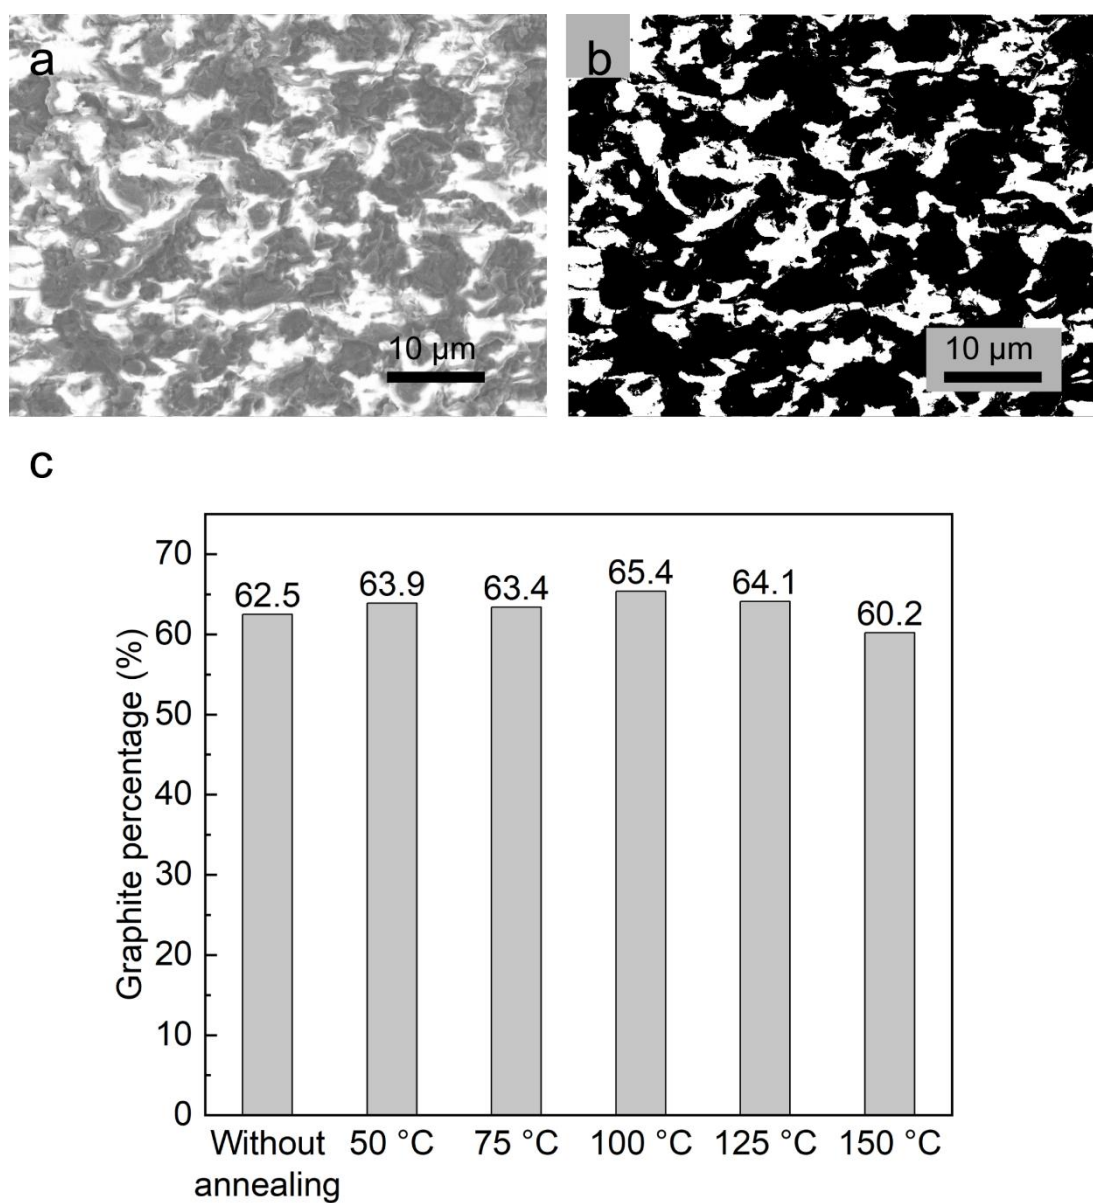

**Figure S3.** a) The original and SEM image. b) Image after binarization. The grayscale threshold is set to 0.65. c) Graphite percentage of Gr-AC composite under unannealed and annealing at 50, 75, 100, 125, and 150  $^{\circ}\text{C}$ , respectively.
